# Supplementary material for: Polyscias filicifolia (Araliaceae) Hairy Roots with Antigenotoxic and Anti-Photogenotoxic Activity
Source: MDPI journal article supplement (doi:10.3390/molecules27010186), 2021-12-29
Supplement: s1 [file s1]

# *Polyscias filicifolia* (Araliaceae) Hairy Roots with Antigenotoxic and Anti-photogenotoxic Activity

Anita Śliwińska<sup>1</sup>, Ramona Figat<sup>2\*</sup>, Anna Zgadzaj<sup>2</sup>, Beata Wilenska<sup>3,4</sup>, Aleksandra Misicka<sup>3,4</sup>, Grzegorz Nałęcz-Jawecki<sup>2</sup>, Agnieszka Pietrosiuk<sup>1</sup> and Katarzyna Sykłowska-Baranek<sup>1</sup>

<sup>1</sup> Department of Pharmaceutical Biology and Medicinal Plant Biotechnology, Faculty of Pharmacy, Medical University of Warsaw, 1 Banacha St, 02-097 Warsaw, Poland; anita.sliwinska@wum.edu.pl (A.Ś.); katarzyna.syklowska-baranek@wum.edu.pl (K.S.B.); agnieszka.pietrosiuk@wum.edu.pl (A.P.)

<sup>2</sup> Department of Environmental Health Science, Medical University of Warsaw, Faculty of Pharmacy, Banacha 1, 02-097 Warsaw, Poland; rfigat@wum.edu.pl (R.F.); zgadzaj@wum.edu.pl (A.Z.); gnalecz@wum.edu.pl (G.N.J.)

<sup>3</sup> Faculty of Chemistry, University of Warsaw, 1 Pasteura St., 02-093 Warsaw, Poland; bwilenska@chem.uw.edu.pl (B.W.); misicka@chem.uw.edu.pl (A.M.)

<sup>4</sup> Biological and Chemical Research Centre, 101 Żwirki i Wigury St., 02-097 Warsaw, Poland

\* Correspondence: e-mail@e-mail.com; rfigat@wum.edu.pl (R.F.); Tel.: +4822 5720740

**Table S1.** Effect of various media modifications on the growth of fresh, dry biomass and the K-1 line growth index of hairy roots of *Polyscias filicifolia*.

| Medium                                        | Fresh biomass<br>[mg] | Dry biomass<br>[mg] | Growth index<br>[%] |
|-----------------------------------------------|-----------------------|---------------------|---------------------|
| DCR I with L- glutamine 500 mg/L,<br>S-40 g/L | 26.3 ± 1.14           | 2.37 ± 0.08         | 480.8 ± 23.63       |
| WPM without growth regulators, S- 30<br>g/L   | 9.9 ± 0.46            | 0.75 ± 0.11         | 123.6 ± 12.32       |
| WPM with L-glutamine 500 mg/L,<br>S- 30g/L    | 11.2 ± 0.46           | 0.92 ± 0.02         | 149.3 ± 7.86        |
| WPM without growth regulators, S- 40<br>g/L   | 12.4 ± 0.47           | 1.04 ± 0.01         | 177.10 ± 9.26       |
| WPM with L-glutamine 500 mg/L,<br>S- 40 g/L   | 14.4 ± 0.46           | 1.19 ± 0.14         | 220.5 ± 8.10        |

DCR I – DCR medium (Gupta and Durzan, 1985) modified by addition of L-glutamine 500 mg/L and with increased to 400 mg/L  $\text{MgSO}_4 \times 7 \text{H}_2\text{O}$  (Syklovska-Baranek et al., 2009) and sucrose up to 40g/L.

WPM – Woody Plant Medium (Lloyd and McCown, 1981).

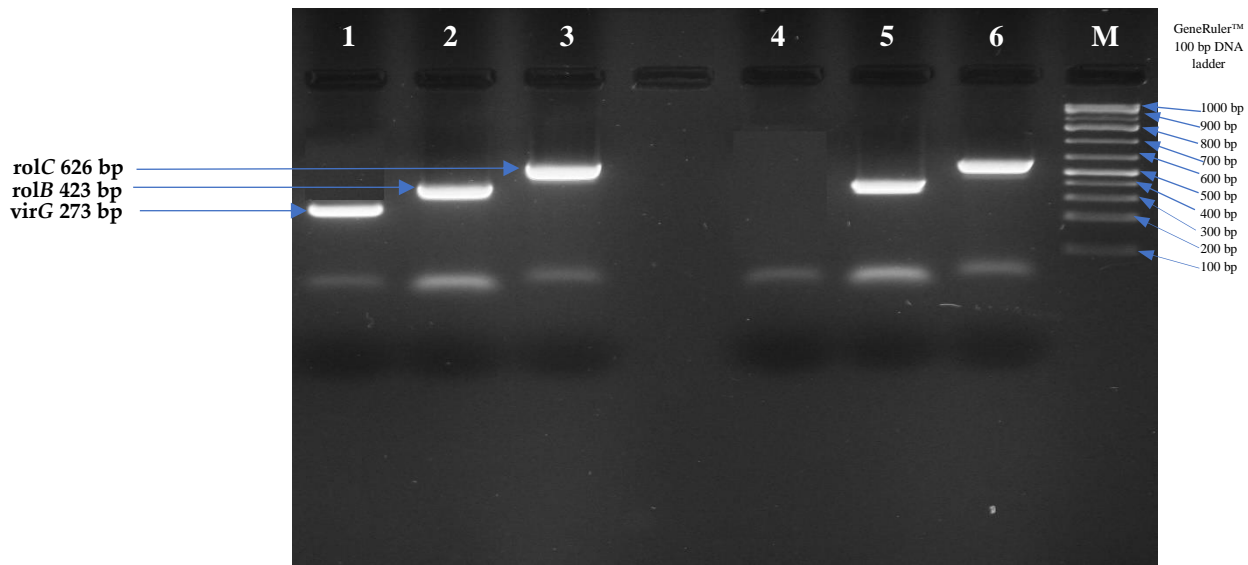

**Figure S1.** Confirmation of genetic transformation by PCR analysis of genomic DNA isolated from *Polyscias filicifolia* hairy roots of K-1 line:

M - molecular weight marker (GeneRuler™ 100 bp DNA ladder);

line 1 - *virG*. line 2 - *rolB* (423 bp); line 3 - *rolC* (626 bp) of *Agrobacterium rhizogenes* 15834 Ri plasmid;

line 4: *virG* in K-1 hairy roots; line 5: *rolB* in K-1 hairy roots; line 6: *rolC* in K-1 hairy roots.
